# Article

## 1 The genomic landscape of recombination rate variation in *Chlamydomonas* 2 *reinhardtii* reveals a pronounced effect of linked selection

3 Ahmed R. Hasan<sup>1,2</sup>, Rob W. Ness<sup>1,2</sup>

4 <sup>1</sup> Department of Cell and Systems Biology, University of Toronto, Toronto, ON M5S  
5 3G5, Canada

6 <sup>2</sup> Department of Biology, University of Toronto Mississauga, Mississauga, ON L5L  
7 1C6, Canada

8 Correspondence: Ahmed Hasan, [ahmed.hasan@mail.utoronto.ca](mailto:ahmed.hasan@mail.utoronto.ca)

9

10 Keywords: recombination rate variation, linked selection, frequency of sex, GC-biased  
11 gene conversion, *Chlamydomonas*

12

13

14

15

16

17

18

19

20

21

22

23

24

25

26

27

## 28 Abstract

29 Recombination confers a major evolutionary advantage by breaking up linkage dise-  
30 quilibrium (LD) between harmful and beneficial mutations and facilitating selection.  
31 Here, we use genome-wide patterns of LD to infer fine-scale recombination rate  
32 variation in the genome of the model green alga *Chlamydomonas reinhardtii* and  
33 estimate rates of LD decay across the entire genome. We observe recombination  
34 rate variation of up to two orders of magnitude, finding evidence of recombination  
35 hotspots playing a role in the genome. Recombination rate is highest just upstream  
36 of genic regions, suggesting the preferential targeting of recombination breakpoints  
37 in promoter regions. Furthermore, we observe a positive correlation between GC  
38 content and recombination rate, suggesting a role for GC-biased gene conversion  
39 or selection on base composition within the GC-rich genome of *C. reinhardtii*. We  
40 also find a positive relationship between nucleotide diversity and recombination,  
41 consistent with widespread influence of linked selection in the genome. Finally, we  
42 use estimates of the effective rate of recombination to calculate the rate of sex that  
43 occurs in natural populations of this important model microbe, estimating a sexual  
44 cycle roughly every 770 generations. We argue that the relatively infrequent rate of  
45 sex and large effective population size creates an population genetic environment  
46 that increases the influence of linked selection on the genome.

47

48

49

50

51

52

53

## 54 Introduction

55 Recombination, the shuffling of existing genetic material, is both a fundamental  
 56 evolutionary process and required to ensure proper disjunction of chromosomes  
 57 during meiosis. Meiotic recombination has two possible outcomes: crossing over (CO)  
 58 and non-crossing over (NCO), also known as gene conversion. There is clear evidence  
 59 that recombination rate varies at multiple scales across nature, with variability  
 60 observed within and between taxa as well as within the genome (Stapley et al.,  
 61 2017). Recombination reduces interference between linked adaptive and harmful  
 62 mutations and therefore is an important determinant of how well natural selection  
 63 can act. The spatial heterogeneity of recombination within genomes means that  
 64 local recombination rate is an important determinant of the efficacy of selection  
 65 and other evolutionary processes in a given genomic region (Hill and Robertson,  
 66 1966, Felsenstein, 1974, McVean et al., 2004). Understanding the predictors of  
 67 recombination rate variation has thus constituted a core objective in the study of  
 68 how recombination affects genome evolution.

69 Across the species that have been examined to date, predictors of recombination  
 70 rate variation remain inconsistent (reviewed in Choi and Henderson 2015, Stapley  
 71 et al. 2017). In many mammalian genomes, which display a high degree of fine-scale  
 72 variability in recombination rate, the presence of recombination hotspots is known to  
 73 be driven by the double strand break-inducing histone H3 methyltransferase protein  
 74 PR domain-containing 9 (PRDM9) (Baudat et al., 2010, Parvanov et al., 2010,  
 75 Baudat et al., 2013). However, studies of recombination in non-mammalian model  
 76 organisms have uncovered conservation of hotspot regions over long evolutionary  
 77 time scales at or near functional genomic elements, such as near transcription start  
 78 sites (Tsai et al., 2010, Singhal et al., 2015, Lam and Keeney, 2015). Hotspots  
 79 in *Saccharomyces cerevisiae* have been found to preferentially occur in GC-rich  
 80 promoter regions (Gerton et al., 2000, Lam and Keeney, 2015) and regions of open  
 81 chromatin (Wu and Lichten, 1994, Berchowitz et al., 2009). Yet other predictors

are less consistent in their effects on recombination frequency across systems. For example, local methylation is observed to suppress recombination in *Arabidopsis thaliana* (Yelina et al., 2015) yet in humans, germline methylation levels are positively correlated with recombination rate (Sigurdsson et al., 2009). Similarly, GC content is positively correlated with recombination rate in humans and yeast, but not in *A. thaliana* (Fullerton et al., 2001, Mancera et al., 2008, Wijnker et al., 2013). Finally, in contrast to the hotspot-punctuated recombination landscapes observed in the above species, the *Caenorhabditis elegans* genome is largely devoid of hotspots altogether, instead displaying relatively large genomic blocks of constant recombination rate (Rockman and Kruglyak, 2009, Andersen et al., 2012). Whilst the presence of PRDM9 does explain many of the patterns observed in mammalian genomes, a variety of other predictors have been observed thus far, often without consistent effects between systems.

High-resolution estimates of genome-wide recombination rate variation have thus far been constrained to a few model animals, fungi, and land plants, which represent a very small subset of eukaryote diversity. What determines recombination landscapes and whether PRDM9-like drivers of recombination rate exist in other taxa remains to be discovered. The recombination profiles of most protists remain unknown, and in some of those cases, whether they are even sexual in the first place (D'Souza and Michiels, 2010, Grimsley et al., 2010, Stapley et al., 2017). It is estimated that the rate of sex is unknown in nearly all (>99%) free-living protist species (Weisse, 2008). The rate of sex is especially relevant to overall estimates of recombination in the case of unicellular eukaryotes that switch between clonal and sexual reproduction. In a primarily asexual population, it follows that mutation will generate the vast majority of novel genetic material over evolutionary time, while the relative reduction of recombination will, all else being equal, result in a more pronounced effect of linked selection (Agrawal and Hartfield, 2016, Hartfield, 2016). The rate of sex can be estimated as the relative frequency of meioses to mitoses by combining direct

estimates of the recombination ( $r$ ) and mutation ( $\mu$ ) rate with population estimates of genetic diversity ( $4N_e\mu$ ) and the effective recombination rate ( $4N_er$ ) (Tsai et al., 2008). Although this estimation is possible, there are very few organisms in which diversity ( $\theta$ ), LD ( $\rho$ ), recombination rate ( $r$ ), and mutation rate ( $\mu$ ) are known.

Here, we examine recombination rate variation across the genome in the facultatively sexual model green alga *Chlamydomonas reinhardtii*, and estimate its rate of sex in nature. We use a population genomic method to infer recombination rates, allowing for a more fine-scale assessment than would otherwise be possible with traditional linkage mapping. In this study, we use whole-genome sequencing of 19 *C. reinhardtii* field isolates from two nearby localities in Quebec, Canada, to address the following questions using LD-based approaches: 1) What is the landscape of recombination rate variation in the genome of *C. reinhardtii*? 2) What genomic features predict recombination rate variation? 3) How does recombination rate correlate with diversity? 4) What is the rate of sex in natural populations of *C. reinhardtii*? In doing so, we present a fine-scale estimate of genome-wide recombination rate variation in the organism, and find an enrichment of recombination hotspots immediately upstream and downstream of genes; a pattern consistent with observations made in other non-mammalian systems.

## Results

### The variable landscape of recombination in *C. reinhardtii*

From our population of 19 individuals (Table S1), we calculated fine-scale recombination landscapes across the genome of *C. reinhardtii* using the coalescent-based population recombination rate estimator LDhelmet 1.7 (Chan et al., 2012). LDhelmet estimates recombination rate between adjacent pairs of SNPs in units of  $\rho/\text{bp}$ , where  $\rho = 2N_er$ ; this unit is henceforth referred to as  $\rho LD$ . The genome-wide average

recombination rate was  $\rho LD = 0.0044/\text{bp}$ , while mean recombination rates for each chromosome varied over an order of magnitude from 0.0026 to 0.0115, inversely scaling with chromosome lengths (Fig. S2,  $R^2 = 0.4803$ ,  $p = 0.002$ ). Genome-wide  $\rho LD$  estimates were then summarized in non-overlapping 2 kb windows for fine-scale analysis, with windows showing variation in recombination rate of up to an order of magnitude; the distribution of recombination rates is shown in Fig. 1A. We then investigated for the presence of recombination hotspots, defining a hotspot as a region that was 1)  $>2$  kb in length and 2) exhibited a  $>5$ -fold increase in  $\rho LD$  as compared to the surrounding 80 kb of sequence on either side, following previous hotspot definitions (Singhal et al., 2015). Under these criteria, we found evidence of hotspots in all chromosomes, with 904 hotspot regions in total representing 2.65% of the genome, where the average  $\rho LD$  within hotspots was more than 6 times the genome average (mean length = 3.19 kb, mean  $\rho LD$  fold increase over local background = 10.09, mean distance between adjacent hotspots = 123 kb, mean  $\rho LD$  at hotspots = 0.02799).

To examine the decay of LD with physical distance in *C. reinhardtii*, we calculated pairwise LD ( $r^2$ ) between SNPs on each chromosome using plink v1.90 (Chang et al., 2015). We then modeled the expected decay of LD with physical distance for each chromosome following equation 3 from Hill and Weir (1988) (Fig. 1B). Estimates of LD measured as  $r^2$  dropped to half of their starting value within a mean distance of 164 bp (range 93 - 394 bp). Moreover, the decay of  $r^2$  leveled off within a mean distance of 9500 bp, where ‘leveling off’ was defined as the point at which the instantaneous rate of change in  $r^2$  with physical distance approximates 0 to six significant digits (mean  $r^2$  at level off point =  $0.0585 \pm 0.0017$ ). In concordance with the relationship observed between LDhelmet  $\rho LD$  values and chromosome length, we also observed that LD approaches baseline levels faster in shorter chromosomes, although this correlation is marginally nonsignificant (Spearman’s  $\rho = 0.4559$ ,  $p = 0.067$ ).

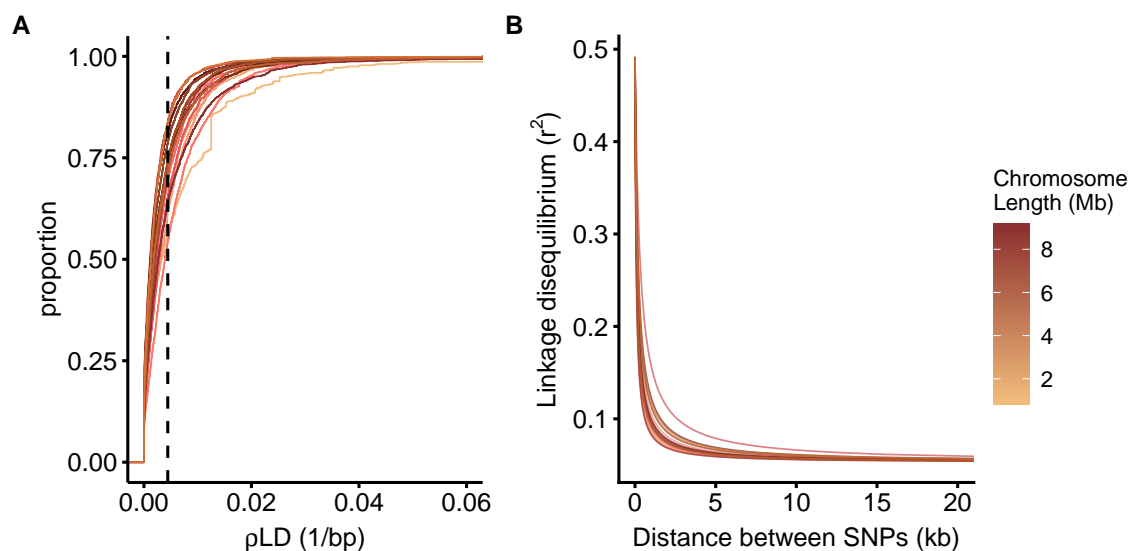

Figure 1: **A** Cumulative frequency distribution of  $\rho LD$  for each chromosome of *C. reinhardtii*. Each curve represents one of the 17 chromosomes, shaded by chromosome length.  $\rho LD$  values were summarised in 2 kb windows. The vertical dashed line indicates the genomewide mean  $\rho LD$  value. **B** Decay of linkage disequilibrium ( $r^2$ ) across the 17 chromosomes of *C. reinhardtii*, modeled according to equation 3 from Hill and Weir (1988).

164

## 165 Recombination rate is highest immediately surrounding genes

166 To investigate the correlates of recombination across the genome, we examined how  
167  $\rho LD$  varied with different functional annotations in the *C. reinhardtii* reference  
168 genome (Merchant et al., 2007) (Fig. 2). We found that recombination rate was  
169 11.9% higher in intergenic regions (mean  $\rho LD = 0.004877$ ) than genic regions (mean  
170  $\rho LD = 0.04358$ , Mann-Whitney U test,  $p < 2.2 \times 10^{-16}$ ). Within intergenic regions,  
171 proximity to genes is a strong predictor of elevated recombination rate, with sites  
172 within 2 kb of genes displaying 24.2% higher mean  $\rho LD$  than the genome background  
173 (mean  $\rho LD$  of sites within 2 kb of genes = 0.005510). There is a striking and  
174 statistically significant 63% increase in recombination within the 2 kb upstream of  
175 genes compared to the adjacent 5' UTR (Mann-Whitney U test,  $p = 3.16 \times 10^{-16}$ ;  
176  $\rho LD$  upstream = 0.005707,  $\rho LD$  5' UTR = 0.003498). Contrary to our expectations,

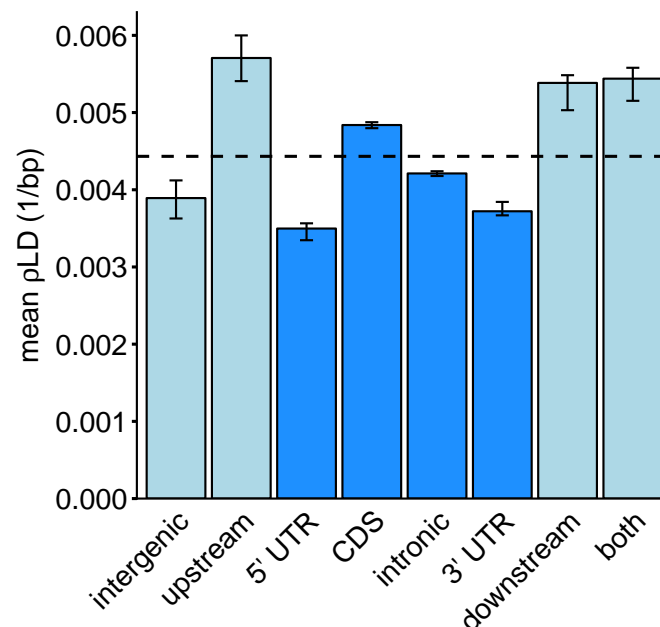

Figure 2:  $\rho LD$  in different annotation categories across the *C. reinhardtii* genome, with intergenic annotations in light blue and genic annotations in dark blue. Error bars represent bootstrapped 95% confidence intervals ( $n = 1000$ ). The annotations ‘upstream’ and ‘downstream’ represent intergenic sites that were within 2 kb of a genic region, while ‘both’ indicates sites that are downstream of one gene and upstream of another. ‘intergenic’ sites are all other intergenic sites more than 2 kb from the nearest gene. The dashed horizontal line represents the mean genome-wide  $\rho LD$  value.

177 protein-coding sequence had significantly higher rates of recombination than either  
178 the 5' UTR or introns (Mann-Whitney U test,  $p = 5.69 \times 10^{-5}$ ;  $\rho LD$  CDS =  
179 0.004838,  $\rho LD$  introns = 0.004211). Finally, we examined hotspot enrichment across  
180 annotations, finding highest enrichment in the 2 kb of sequence flanking genes  
181 (Fisher’s exact test,  $p < 2.2 \times 10^{-16}$ ). 13.9% of all hotspots occur in the 8.7% of the  
182 genome corresponding to these annotations.

183 The association between recombination rate and genome annotation has been  
184 hypothesized to be driven by differential patterns of DNA methylation across func-  
185 tional annotations. Sequence methylation is subdivided into three types, depending  
186 on the sequence context surrounding a methylated cytosine: CG, CHG, and CHH  
187 (where H = A, T, or C). Given that the enrichment of recombination hotspots



flanking genes in *C. reinhardtii* suggests a role for open chromatin in determining recombination localization (see Discussion), the open chromatin model would thus predict recombination suppression in heterochromatic regions (Choi and Henderson, 2015). To examine the relationship between DNA methylation patterning and recombination rate in *C. reinhardtii*, we obtained bisulfite sequencing data from three clones of one of the Quebec *C. reinhardtii* strains included in the present analysis (CC-2937) (Kronholm et al., 2017), and summarised methylation levels across all three contexts and  $\rho LD$  values in 200 bp windows. Here, we opted for a much smaller window size than in previous analyses because we expected that the highly localized nature of DNA methylation (Suzuki and Bird, 2008) would mean that effects on recombination would be at very fine scales. We found that the correlation between  $\rho LD$  and methylation, although significant, is only very weakly negative (Spearman's  $\rho = -0.044$ ,  $p < 2.2 \times 10^{-16}$ ), indicating that DNA methylation is not a strong driver of recombination in *C. reinhardtii*.

## Recombination rate is positively correlated with nucleotide diversity

If background selection and selective sweeps are common, we expect that linked selection will drive a reduction in neutral diversity in regions of low recombination. To examine whether linked selection was occurring in the *C. reinhardtii* genome, we first examined the relationship between our  $\rho LD$  estimates and neutral nucleotide diversity ( $\theta_\pi = 4N_e\mu$ ) in non-overlapping 10 kb windows using a partial Spearman's correlation. Here, we controlled for functional density, defined as the number of coding sites per window, since functional density may correlate with either or both of recombination rate and nucleotide diversity and confound the relationship between the two (Payseur and Nachman, 2002, Flowers et al., 2012). We found  $\theta_\pi$  at selectively unconstrained (intronic, intergenic, and four-fold degenerate) sites was positively associated with  $\rho LD$  ( $R^2 = 0.3385$ ,  $p < 2.2 \times 10^{-16}$ ), in alignment with expectations from linked

selection (Fig. 3A). Concordant with this observation, we found nucleotide diversity to be nearly 50% higher in hotspot regions ( $\theta_\pi = 0.02676$ , 95% CI = 0.0265-0.0273,  $p < 2.2 \times 10^{-16}$ ) than in coldspots, or regions exhibiting 5-fold  $\rho LD$  reductions relative to the surrounding 80 kb of sequence ( $\theta_\pi = 0.01793$ , 95% CI = 0.0179-0.0181,  $p < 2.2 \times 10^{-16}$ ).

Despite the strong correlation observed above, it stands that both diversity and  $\rho LD$  are confounded by  $N_e$ , which will vary across the genome due to selection, linkage, and variation in local coalescence time. To test whether the patterns observed using  $\rho LD$  reflects physical recombination rate  $r$  and not just variance in  $N_e$ , we obtained the crossover data of Liu et al. (2017), who sequenced 27 F1 tetrads obtained from a cross between *C. reinhardtii* strains CC2935  $\times$  CC2936 (both of which are included in the present analysis) and directly inferred the locations of recombination events from sequence data. We binned  $\rho LD$  estimates from genomic intervals, and then for each bin, calculated CO density as the number of COs that occurred in genomic regions with that  $\rho LD$  value over the total number genomic sites with that range of  $\rho LD$  values. This measure of CO density was then used as a proxy for physical recombination rate, which is unaffected by  $N_e$ . Here, we obtained a positive and significant correlation between  $\rho LD$  and log-scaled CO density, weighting for the number of sites in each bin (Fig. 3B,  $R^2 = 0.559$ ,  $p = 9.84 \times 10^{-10}$ ), indicating that variation in  $\rho LD$  is indeed reflective of variation in  $r$  and not just  $N_e$ .

Next, we extended the same binning method to directly investigate whether COs tend to occur more frequently in regions of the genome with higher diversity. Here, we calculated  $\theta_\pi$  in windows across the genome and then binned sites according to their diversity. (see Methods). We calculated CO density values for the sites in the genome corresponding to each bin. We found CO density and  $\theta_\pi$  were also significantly correlated (Fig. 3C,  $R^2 = 0.383$ ,  $p = 0.0016$ ), further suggesting the action of linked selection in the genome.

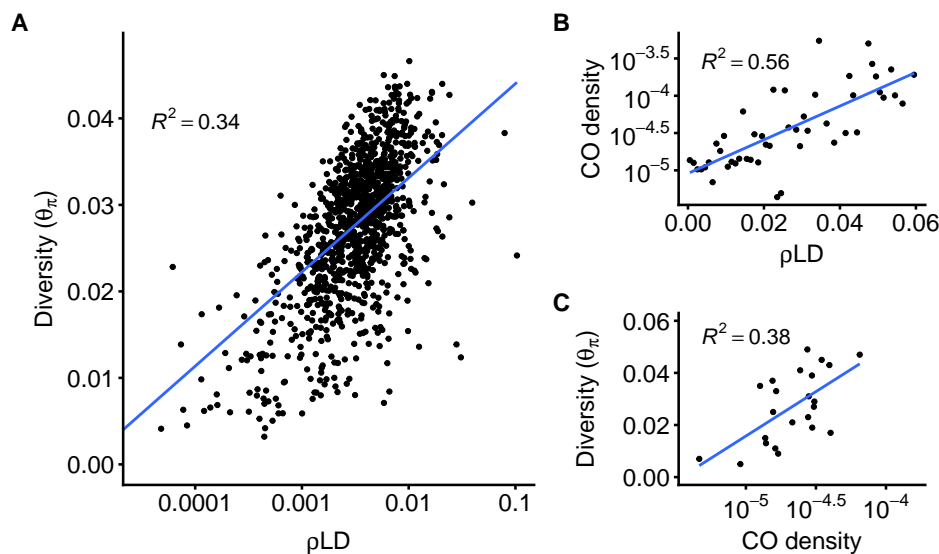

Figure 3: **A** Neutral diversity ( $\theta_\pi$ ) scales with LD recombination rate in 100 kb windows. Nucleotide diversity was calculated at intronic, intergenic, and 4-fold degenerate sites. For clarity, we have constrained the plot to windows where  $\rho LD$  was greater than  $5 \times 10^{-4}$ . **B** LD recombination rate is correlated with crossover density, as obtained from the dataset of Liu et al. (2017). **C** Crossover density from the Liu et al. (2017) dataset correlates with neutral diversity.

## 242 Recombination rate is positively correlated with GC content

243 Recombination rate has also been found to correlate with GC content in a variety  
 244 of systems (Mugal et al., 2015). This relationship is often attributed to GC-biased  
 245 gene conversion (gBGC), in which heteroduplex mismatches between GC and AT  
 246 bases formed during recombination are preferentially repaired in favour of GC  
 247 nucleotides (Galtier and Duret, 2001). From a population genetic perspective, this  
 248 effect is indistinguishable from positive selection in favour of GC alleles, and can  
 249 thus substantially impact genome evolution (Duret and Galtier, 2009, Ratnakumar  
 250 et al., 2010). *C. reinhardtii* is known to have a highly GC-rich genome (64%) despite  
 251 a strong A/T mutational bias, raising the possibility that gBGC may have played a  
 252 role in the evolution of its genome (Ness et al., 2015). Here, we find that GC content  
 253 does display a positive correlation with recombination rate in non-overlapping 10 kb  
 254 windows (Spearman's  $\rho = 0.3028$ ,  $p < 2.2 \times 10^{-16}$ ).

## 255 Estimating the frequency of sex in *C. reinhardtii*

256 Due to the fact that mutations arise every cell division (each meiosis and mitosis)  
 257 yet only a fraction of cell divisions are sexual ( $f$ ) and allow recombination to occur.  
 258 We can therefore use estimates of neutral diversity ( $\theta = 2N_e\mu$ ) and population  
 259 recombination rate ( $\rho = 2N_er$ ) combined with lab estimates of  $\mu$  and  $r$  to roughly  
 260 estimate the relative frequency of mitosis to meiosis, or the frequency of clonal relative  
 261 to sexual reproduction (Ruderfer et al., 2006, Tsai et al., 2008). If we are to take  $r$  to  
 262 represent  $r$  multiplied by the frequency of sex  $f$  relative to clonal reproduction (such  
 263 that  $\rho = 2N_elf$ ), we can use existing estimates of the other parameters to solve for  
 264 the ratio  $1/f$ .

265 Thus, our genome-wide recombination rate estimate of  $4.43 \times 10^{-3}$  can be used  
 266 in tandem with previous estimates of the *C. reinhardtii* recombination rate ( $r = 12$   
 267 cM/Mb) (Liu et al., 2017), the mutation rate ( $\mu = 9.63 \times 10^{-10}$ ) (Ness et al., 2015),  
 268 and neutral diversity ( $\theta = 2.75 \times 10^{-2}$ ) (Ness et al., 2016) to estimate the frequency  
 269 of sex in natural populations of *C. reinhardtii*. With this approach, we obtain  
 270  $f = 0.001292$ , corresponding to one sexual generation for every  $1/f = \sim 770$  asexual  
 271 generations.

272

## 273 Discussion

274 In this study, we have generated a fine-scale estimate of the recombination rate  
 275 landscape in *C. reinhardtii* using patterns of linkage disequilibrium in whole-genome  
 276 resequencing data, revealing a punctuated recombination landscape with frequent  
 277 hotspots. We also find an enrichment of recombination hotspots within 2 kb of  
 278 genes that leads to an overall increase in recombination rate surrounding genes,  
 279 in concordance with observations in a number of other PRDM9-lacking organisms.  
 280 The variation in recombination rate across the genome is correlated with nucleotide

diversity, suggesting that the influence of linked selection is widespread in the genome and that recombination is a major driver of genetic variation. Lastly, we have used our estimate of the population recombination rate to estimate the frequency of sex as being once every  $\sim 770$  generations in *C. reinhardtii*, allowing for further insights into the ecology and evolution in of this model organism in nature.

Assuming an  $N_e$  of  $1.4 \times 10^7$  (Ness et al., 2016), the genome-wide  $\rho LD$  estimate of  $4.43 \times 10^{-3}$  can be converted to an estimate of  $r = \rho/2N_e = 0.016$  cM/Mb, following the method described in Auton and McVean (2012). Although this estimate of genome-wide  $r$  on its own is approximately two orders of magnitude below most plants (Henderson, 2012), including the parameter  $f$  ( $= 0.001292$ ) such that  $r = \rho/2N_e f$  yields a genome-wide recombination rate estimate of  $r = 12.25$  cM/Mb, which is closer to the estimate of  $r = 9.15$  cM/Mb from the genetic map of *C. reinhardtii* (Kathir et al., 2003, Merchant et al., 2007, Henderson, 2012). This suggests that in *C. reinhardtii*, infrequent sex reduces effective recombination, bearing consequences for the effects of linked selection in the genome (see below).

Between chromosomes, we observe variation in mean recombination rates across an order of magnitude, and also find that recombination rate inversely correlates with chromosome length (Fig. S2), a relationship consistent with prior studies in a variety of organisms (Kaback et al., 1992). Given that each chromosome requires at least one crossover event to ensure proper meiotic disjunction (Page and Hawley, 2003), it follows that shorter chromosomes exhibit higher per-base crossover rates, resulting in more pronounced signatures of LD breakdown. Furthermore, *C. reinhardtii* exhibits moderate rates of LD decay across all 17 chromosomes. Our estimates of the distance ( $\leq 10$  kb) at which LD ( $r^2$ ) decays to baseline LD levels are shorter than those obtained in a previous study of *C. reinhardtii* that reported a decay to baseline within  $\sim 20$  kb (Flowers et al., 2015). The difference between our estimates may be caused by genetic structure in *C. reinhardtii*; where we sequenced isolates all from nearby localities, Flowers et al. utilized a mix of lab strains alongside isolates from a

variety of populations across Quebec and Eastern United States. This disparity in our respective estimates supports the idea that there are barriers to recombination across the geographic range of *C. reinhardtii* in North America, with the resulting population structure increasing LD among variants.

At the 2 kb scale, we find widespread recombination hotspots across the genome, similar to observations in mammals, angiosperms, and yeast (Stapley et al., 2017). On the other hand, this recombination profile is unlike that of both *C. elegans*, which has a comparatively homogenous fine-scale recombination landscape (Rockman and Kruglyak, 2009, Kaur and Rockman, 2014) as well as *D. melanogaster*, which displays some degree of fine-scale heterogeneity but little evidence for highly localized elevations in recombination rate (Chan et al., 2012, Manzano-Winkler et al., 2013).

We see elevated recombination and an enrichment of hotspots within regions immediately flanking genes in *C. reinhardtii*, consistent with a trend conserved across the lineages of nearly all PRDM9-lacking organisms studied thus far. Specifically, recombination hotspots upstream of genes have been observed in fungi (Berchowitz et al., 2009, Tsai et al., 2010, Lam and Keeney, 2015), finches (Singhal et al., 2015), as well as angiosperms, such as wheat (Saintenac et al., 2009), maize (Li et al., 2015) and *A. thaliana* (Wijnker et al., 2013, Choi et al., 2013). In addition, the same pattern is observed in the mammalian Canidae family, where PRDM9 was lost relatively recently (Axelsson et al., 2012, Auton et al., 2013). In these PRDM9-lacking organisms, chromatin structure has been invoked as an explanation of recombination hotspot conservation upstream of genes (Wu and Lichten, 1994, Lichten, 2008, Berchowitz et al., 2009). In eukaryotes, DNA is wrapped in nucleosomes, with nucleosome occupancy depleted in regions where the DNA needs to be accessible, such as for the purposes of transcription. Promoter regions upstream of genes thus tend to display greater nucleosome depletion, which may in turn allow for recombination machinery to more easily induce double strand breaks in these regions (Pan et al., 2011, Lam and Keeney, 2015). Our observations of elevated recombination rate immediately

flanking genes suggest a similar mechanism acting in the *C. reinhardtii* genome, and show that this trend is even more wide-spread, extending to green algae.

Within genes, however, we observe more surprising patterns in recombination rate variation. We might expect that recombination rates will evolve to be lower in functional regions, so as to suppress adverse mutagenic effects that may result from crossing over. Furthermore, recombination events in functional regions that result in deleterious mutations may be selected against and therefore reduce evidence of recombination. The 5' UTR in *C. reinhardtii* displayed the lowest recombination rate of any annotation, despite recombination rate elevations observed in the UTRs of other species (Mancera et al., 2008, Kawakami et al., 2017). One explanation could be that recombination-associated deleterious mutations in the functional components of the UTR region might have been eliminated by selection, increasing observed LD. However, were this the case, we would expect a similar trend in protein-coding exons, where we instead observe the highest rates of within-gene recombination. Moreover, recombination rate in intronic sequence is intermediate to the UTR and exonic sequence, whereas under a mutagenic hypothesis we would instead expect within-gene recombination rates to be higher in introns than in exons. Altogether, the idea that selection has reduced effective recombination in functional sites does not appear to hold from the current data. Thus, either recombination is not mutagenic in *C. reinhardtii*, or we must invoke another mechanism, such as chromatin conformation or some yet to be discovered driver of recombination, to explain the observed patterns. Unfortunately, relatively little is known about chromatin conformation in *C. reinhardtii*, and we see only a very weak association with methylation, leaving identification of the drivers of recombination rate variation in and around genes an open question.

We find that  $\rho LD$  positively correlates with nucleotide diversity across the genome of *C. reinhardtii*, indicating the action of linked selection (Fig. 3). This correlation is also observed using the CO dataset of Liu et al. (2017) as a proxy for physical



recombination rate (Fig. 3C), which unlike  $\rho LD$  and  $\theta_\pi$  is not scaled by  $N_e$ . Theory predicts that the correlation of recombination and diversity arises as a consequence of background selection and/or selective sweeps reducing diversity in regions of otherwise low recombination (Charlesworth et al., 1993, Cutter and Payseur, 2013, Campos et al., 2017). We also find diversity to be higher in hotspot regions than coldspot regions, which is to be expected if linked selection is less pronounced in regions of elevated recombination.

Our result suggests that linked selection is a strong determinant of standing genetic variation in *C. reinhardtii*. Given that *C. reinhardtii* is likely to have a very high effective population size (Ness et al., 2012) it is expected that many mutations will be effectively selected (i.e.  $N_{es} > 1$ ) (Kimura, 1962). However, while the effective population size is very large, the relatively infrequent rate of sex (see below) means that the effective recombination rate is not particularly high relative to obligately sexual species. The interaction of a large  $N_e$  facilitating efficient selection alongside reduced recombination due to a facultatively sexual life cycle means that the influence of linked selection may be pronounced in the genome, and modulated less by recombination rate *per se* than would be the case in obligate outcrossers. This principle may be more widespread in unicellular eukaryotes, which live in large populations that are only periodically sexual.

In addition, we also find a weakly positive correlation between GC content and local recombination rate. Our result is consistent with a trend seen in other organisms such as yeast (Gerton et al., 2000), mouse (Jensen-Seaman et al., 2004), and humans (Fullerton et al., 2001) (although *A. thaliana* is a notable exception, displaying an inverse correlation - see Wijnker et al. 2013). The correlation we observe is in line with the presence of GC-biased gene conversion (gBGC) (Galtier and Duret, 2001) acting to drive up GC content in the *C. reinhardtii* genome. The potential action of gBGC is especially notable considering that despite a strong A/T mutational bias, *C. reinhardtii* has a GC-rich genome (64.1%) (Merchant et al., 2007, Ness



et al., 2015). While our result lends support to a possible role of gBGC, a recent study revealed only weak gBGC from the genome sequences of 27 *C. reinhardtii* tetrads, in concert with a low overall rate of gene conversion, thus indicating a very minor role for biased gene conversion in the evolution of its genome (Liu et al., 2017). It is worth noting that using LD-based estimates of population recombination rate, we obtain a stronger correlation between GC content and recombination rate (Spearman's  $\rho = 0.2434$ ) than Liu et al. (Spearman's  $\rho = 0.0646$ ). A stronger GC-recombination correlation when considering historical recombination events suggests that the effects of weak forces governing base composition are more apparent over longer evolutionary timescales. However, there remain other possible explanations for the correlation between recombination and GC content past gBGC: first, simply that more recombination events initiating in GC rich regions, and second, more efficient selection for GC content in regions with higher recombination (Kliman and Hey, 1993, Campos et al., 2012).

Finally, by integrating lab- and population-based measures of recombination and mutation, we have estimated the rate of sex in *C. reinhardtii* to be one meiosis every  $\sim 770$  asexual generations. The frequency is higher than estimates in *S. cerevisiae* ( $\sim 50000$  generations) (Ruderfer et al., 2006) as well as *S. paradoxus* ( $\sim 1000-3000$  generations) (Tsai et al., 2008). However, this method for estimating the frequency of sex is subject to numerous assumptions, chief amongst them neutrality and demographic equilibrium. We assume random mating, no gene flow, and no population subdivision; violations of these assumptions may otherwise result in more prominent LD and thus downwardly bias estimates of the frequency of sex. Despite these caveats, our estimate of sex occurring every  $\sim 770$  generations may point towards a seasonal ecology in *C. reinhardtii*. While the precise rate of mitosis in nature is unknown, log-phase cultures subjected to a light dark cycle typically exhibit 2-3 doublings every 24 hours (Bernstein, 1964, Jones, 1970, Harris et al., 2009). An average of 2.5 doublings per day corresponds to 770 generations every 308

421 days. Considering the fact that sex is induced when conditions worsen and zygotes  
422 are resistant to freezing and other environmental stressors (Morris et al., 1979, Harris  
423 et al., 2009), it is plausible that populations of *C. reinhardtii* in Quebec overwinter  
424 as zygotes, undergoing a sexual cycle approximately once per year.

425 Taken together, our results suggest that populations of *C. reinhardtii* maintain  
426 relatively large effective sizes even at small geographic scales. These large populations  
427 are subject to efficient selection that interacts with infrequent bouts of sexual  
428 reproduction to drive strong effects of linked selection in the genome. The genome also  
429 displays significant heterogeneity in recombination rate, with recombination highest in  
430 the regions flanking genes; however, *C. reinhardtii* has relatively high recombination  
431 in coding exons, which suggests yet to be described drivers of recombination in this  
432 species.

## 433 Materials and Methods

434 *Strains, sequencing, and alignment.* 19 (9 mt+, 10 mt-) natural strains of *Chlamy-*  
435 *domonas reinhardtii*, sampled from Quebec, Canada, were obtained from the Chlamy-  
436 domonas Resource Center. For strains CC2935, 2936, 2937, and 2938, we obtained  
437 publicly available sequencing data (Flowers et al., 2015). These 19 strains are all  
438 sampled from two nearby localities in Quebec, and show no evidence of population  
439 structure (R.J. Craig, personal communication) (summarized in Table S1). Sequenc-  
440 ing and alignment were performed as described previously (Ness et al., 2016). Briefly:  
441 we conducted whole-genome resequencing on the Illumina GAII platform at the  
442 Beijing Genomics Institute, and aligned 100bp PE reads with BWA 0.7.4-r385 (Li  
443 and Durbin, 2009). Since the *C. reinhardtii* reference genome is derived from an mt+  
444 individual and does not include organelles, we appended the chloroplast genome,  
445 the mitochondrial genome, and the mt- locus to allow mapping of reads derived  
446 from these regions. The GATK v3.3 tools HaplotypeCaller and GenotypeGVCFs

were then used to call SNPs and short indels, and stored in Variant Call Format (VCF) files (non default settings: `ploidy=1`, `includeNonVariantSites=true`, `heterozygosity=0.02`, `indel_heterozygosity=0.002`).

*Recombination landscapes and hotspots.* To obtain chromosome-wide maps of recombination rate variation in the *C. reinhardtii* genome, we used LDhelmet 1.7 (Chan et al., 2012), which calculates fine-scale estimates of population recombination in intervals between adjacent SNPs. The coalescent-based approach of LDhelmet also allows for inferences of ancestral recombination rate variation. LDhelmet reports the population recombination rate  $\rho = 2N_e r$  that reflects the size of the recombining population ( $N_e$ ) and the physical recombination rate ( $r$ , recombination events  $\cdot$  bp<sup>-1</sup>  $\cdot$  generation<sup>-1</sup>).

The block penalty parameter in LDhelmet determines the level of smoothing of  $\rho LD$  estimates along the chromosomes. To ascertain the block penalty that reflects real variation in  $\rho LD$ , we computed average  $\rho LD$  in non-overlapping 500 bp windows across the longest chromosome (12) of *C. reinhardtii* using block penalties of 10, 50, and 100. We then performed pairwise correlations between windowed  $\rho LD$  values across different block penalties and found that the estimates were virtually identical, which indicates that at the scale of hundreds of bases, our results were not sensitive to block penalty (Fig. S3). Here, we report data using the default LDhelmet setting of 50. We used a population scaled mutation rate of 0.01 (Ness et al., 2015), and for each chromosome ran LDhelmet for 1,000,000 iterations following 100,000 iterations of burn-in. Default parameters were otherwise retained.

To detect recombination hotspots in LDhelmet's  $\rho LD$  estimates, we modified a Python script from Singhal et al. (2015) that summarises  $\rho LD$  values in non-overlapping windows. Following Singhal et al., we initially defined hotspots as regions that 1) were at least 2 kb in length and 2) exhibited a mean 5-fold increase in  $\rho LD$  as compared to the surrounding 80 kb of sequence, following previous ap-

proaches ([International HapMap Consortium, 2005](#), [Singhal et al., 2015](#)).

*LD decay across chromosomes.* Pairwise calculations of  $r^2$  within each of *C. reinhardtii*'s 17 chromosomes were conducted using plink 1.90 ([Chang et al., 2015](#)). For all pairs of SNPs, plink calculates LD statistics with a maximum likelihood approach described in ([Gaunt et al., 2007](#)). By default, plink filters out pairs of SNPs with an  $r^2$  value below 0.2; we disabled this filtering. We calculated  $r^2$  for all pairs of SNPs within 100 kb of one another, and modeled the expected decay of LD with distance for each chromosome with non-linear least squares regression in R ([R Core Team, 2017](#)) using equation 3 from [Hill and Weir \(1988\)](#).

*Genomic correlates of recombination rate.* We classified the reference genome of *C. reinhardtii* with the following annotations: genic sites were subclassified as protein coding sequence (CDS), exons, introns, and/or UTRs, while intergenic regions were classified as being within 2 kb upstream of a gene ('upstream'), 2 kb downstream of a gene ('downstream'), flanked by genes within 2 kb on either side ('both'), or more than 2 kb from the nearest gene ('intergenic'). For each of the above features, average  $\rho LD$  was calculated from every corresponding site in the genome. Recombination rates for each annotation were bootstrapped for 1000 replicates in order to obtain 95% confidence intervals.

We then examined the relationship between DNA methylation and recombination rate using publicly available bisulfite sequencing data from three clones of *C. reinhardtii* strain CC-2937 ([Kronholm et al., 2017](#)). For read mapping, we used BWA-meth ([Pedersen et al., 2014](#)) and called methylated cytosines in CG, CHG, and CHH contexts using biscuit-0.2.2 ([Zhou, 2017](#)). Following Kronholm et al., we set minimum base quality to 20 and minimum mapping quality to 60. We then used the output VCF file to summarise methylation beta values in 200 bp windows, and examined the correlation between  $\rho LD$  and methylation at the 200 bp scale. We also

examined the relationship between methylation and recombination within each of the three sequence contexts, but observed the same pattern as in the overall correlation.

For the correlation of GC content with recombination rate, we used a custom Python script ([https://github.com/aays/2018-ld-paper/blob/master/antr\\_diversity\\_gen.py](https://github.com/aays/2018-ld-paper/blob/master/antr_diversity_gen.py)) to compute GC content in a given window, and then summarized GC content with  $\rho LD$  values in non-overlapping 10 kb windows.

*Recombination and nucleotide diversity.* Nucleotide diversity ( $\theta_\pi$ ) was calculated at ‘silent’ sites (intronic, 4-fold degenerate and intergenic) in 10 kb windows for downstream correlation with  $\rho LD$ . We performed a partial Spearman’s correlation between  $\rho LD$  and diversity while controlling for functional density, defined as the proportion of sites in a window overlapping a protein-coding exon, using the R package `ppcor`. To examine nucleotide diversity in and out of hotspots, we calculated  $\theta_\pi$  in these regions across the genome in non-overlapping 2 kb windows, and split the resulting dataset using our hotspot classification from earlier. Windowed  $\theta_\pi$  estimates were bootstrapped for 1000 replicates in order to obtain 95% confidence intervals.

To test whether variation in  $N_e r$  was reflective of  $r$  and not just  $N_e$ , we obtained the crossover data of Liu et al. (2017), who sequenced 27 tetrad offspring (= 108 individuals). We binned our  $\rho LD$  estimates for each genomic interval into 50 bins between  $\rho LD$  values of 0 and 0.06, and for each bin, counted the number of Liu dataset COs found in regions of the genome corresponding to that range of  $\rho LD$  values. This count of COs was converted to a density measure by dividing the number of COs in each bin by the number of sites falling within a the  $\rho LD$  values defining a given bin. Next, to examine the relationship between diversity and CO density, we first calculated  $\theta_\pi$  across the genome in 10 kb windows, and then binned these values across 50 bins ranging from 0 to 0.1. Windows with less than 500 silent sites were discarded to reduce noise in diversity estimates and bins with less than 100000

total genomic sites were discarded because with so few COs in the dataset these bins tended to have zero COs. Then, we assigned COs to bins based on local diversity in the region bounded by each CO and calculated COs per site as above.

All statistical tests in this work were implemented using R 3.4.1 (R Core Team, 2017). For all figures in this work, we utilized the R package ggplot2 (Wickham, 2009).

## Acknowledgements

Short read data have been uploaded to the European Nucleotide Archive under study accession ERP109393. This work was supported by a Natural Sciences and Engineering Research Council (NSERC) Discovery grant (RGPIN/06331-2016) and Canadian Foundation for Innovation John R. Evans Leaders fund (35591) to RWN. We thank S.I. Wright and A.M. Moses for helpful discussions and suggestions and Brian Novogradac for facilitating computational support and HPCNODE1. Scripts used in this work can be found at <https://github.com/aays/2018-ld-paper>. We declare we have no competing interests.

## References

- Agrawal, A. F. and Hartfield, M. (2016). Coalescence with background and balancing selection in systems with bi- and uniparental reproduction: Contrasting partial asexuality and selfing. *Genetics*, 202(1):313–326.
- Andersen, E. C., Gerke, J. P., Shapiro, J. A., Crissman, J. R., Ghosh, R., Bloom, J. S., Félix, M.-A., and Kruglyak, L. (2012). Chromosome-scale selective sweeps shape *Caenorhabditis elegans* genomic diversity. *Nat. Genet.*, 44(3):285–290.
- Auton, A. and McVean, G. (2012). Estimating recombination rates from genetic variation in humans. *Methods Mol. Biol.*, 856:217–237.
- Auton, A., Rui Li, Y., Kidd, J., Oliveira, K., Nadel, J., Holloway, J. K., Hayward, J. J., Cohen, P. E., Greally, J. M., Wang, J., Bustamante, C. D., and Boyko, A. R. (2013). Genetic recombination is targeted towards gene promoter regions in dogs. *PLoS Genet.*, 9(12):e1003984.
- Axelsson, E., Webster, M. T., Ratnakumar, A., LUPA Consortium, Ponting, C. P., and Lindblad-Toh, K. (2012). Death of PRDM9 coincides with stabilization of the recombination landscape in the dog genome. *Genome Res.*, 22(1):51–63.
- Baudat, F., Buard, J., Grey, C., Fledel-Alon, A., Ober, C., Przeworski, M., Coop, G., and De Massy, B. (2010). PRDM9 is a major determinant of meiotic recombination hotspots in humans and mice. *Science*, 327(5967):836–840.
- Baudat, F., Imai, Y., and de Massy, B. (2013). Meiotic recombination in mammals: localization and regulation. *Nat. Rev. Genet.*, 14(11):794–806.
- Berchowitz, L. E., Hanlon, S. E., Lieb, J. D., and Copenhaver, G. P. (2009). A



- positive but complex association between meiotic double-strand break hotspots and open chromatin in *Saccharomyces cerevisiae*. *Genome Res.*, 19(12):2245–2257.
- Bernstein, E. (1964). Physiology of an obligate photoautotroph (*Chlamydomonas moewusii*). I. Characteristics of synchronously and randomly reproducing cells and an hypothesis to explain their population curves. *J. Protozool.*, 11:56–74.
- Campos, J. L., Charlesworth, B., and Haddrill, P. R. (2012). Molecular evolution in nonrecombining regions of the drosophila melanogaster genome. *Genome Biol. Evol.*, 4(3):278–288.
- Campos, J. L., Zhao, L., and Charlesworth, B. (2017). Estimating the parameters of background selection and selective sweeps in *Drosophila* in the presence of gene conversion. *Proceedings of the National Academy of Sciences*, page 201619434.
- Chan, A. H., Jenkins, P. A., and Song, Y. S. (2012). Genome-wide fine-scale recombination rate variation in *Drosophila melanogaster*. *PLoS Genet.*, 8(12).
- Chang, C. C., Chow, C. C., Tellier, L. C., Vattikuti, S., Purcell, S. M., and Lee, J. J. (2015). Second-generation PLINK: rising to the challenge of larger and richer datasets. *Gigascience*, 4(1):7.
- Charlesworth, B., Morgan, M. T., and Charlesworth, D. (1993). The effect of deleterious mutations on neutral molecular variation. *Genetics*, 134(4):1289–1303.
- Choi, K. and Henderson, I. R. (2015). Meiotic recombination hotspots - a comparative view. *Plant J.*, 83(1):52–61.
- Choi, K., Zhao, X., Kelly, K. A., Venn, O., Higgins, J. D., Yelina, N. E., Hardcastle, T. J., Ziolkowski, P. A., Copenhaver, G. P., et al. (2013). *Arabidopsis* meiotic crossover hot spots overlap with H2A.Z nucleosomes at gene promoters. *Nat. Genet.*, 45(11):1327–1336.
- Cutter, A. D. and Payseur, B. A. (2013). Genomic signatures of selection at linked sites: unifying the disparity among species. *Nat. Rev. Genet.*, 14(4):262–274.
- D’Souza, T. G. and Michiels, N. K. (2010). The costs and benefits of occasional sex: Theoretical predictions and a case study. *J. Hered.*, 101(suppl\_1):S34–S41.
- Duret, L. and Galtier, N. (2009). Biased gene conversion and the evolution of mammalian genomic landscapes. *Annu. Rev. Genomics Hum. Genet.*, 10(1):285–311.
- Felsenstein, J. (1974). The evolutionary advantage of recombination. *Genetics*, 83(4):845–859.
- Flowers, J. M., Hazzouri, K. M., Pham, G. M., Rosas, U., Bahmani, T., Khraiweh, B., Nelson, D. R., Jijakli, K., Abdrabu, R., Harris, E. H., et al. (2015). Whole-genome resequencing reveals extensive natural variation in the model green alga *Chlamydomonas reinhardtii*. *Plant Cell*, 27(9):2353–2369.
- Flowers, J. M., Molina, J., Rubinstein, S., Huang, P., Schaal, B. A., and Purugganan, M. D. (2012). Natural selection in gene-dense regions shapes the genomic pattern of polymorphism in wild and domesticated rice. *Mol. Biol. Evol.*, 29(2):675–687.
- Fullerton, S. M., Bernardo Carvalho, A., and Clark, A. G. (2001). Local rates of recombination are positively correlated with GC content in the human genome. *Mol. Biol. Evol.*, 18(6):1139–1142.
- Galtier, N. and Duret, L. (2001). GC-content evolution in mammalian genomes: The biased gene conversion hypothesis. *Genetics*, 159:907–911.
- Gaunt, T. R., Rodríguez, S., and Day, I. N. M. (2007). Cubic exact solutions

- for the estimation of pairwise haplotype frequencies: implications for linkage disequilibrium analyses and a web tool ‘CubeX’. *BMC Bioinformatics*, 8(1):428.
- Gerton, J. L., DeRisi, J., Shroff, R., Lichten, M., Brown, P. O., and Petes, T. D. (2000). Global mapping of meiotic recombination hotspots and coldspots in the yeast *Saccharomyces cerevisiae*. *Proc. Natl. Acad. Sci. U. S. A.*, 97(21):11383–11390.
- Grimsley, N., Péquin, B., Bachy, C., Moreau, H., and Piganeau, G. (2010). Cryptic sex in the smallest eukaryotic marine green alga. *Mol. Biol. Evol.*, 27(1):47–54.
- Harris, E. H., Stern, D. B., and Witman, G. B. (2009). *The Chlamydomonas sourcebook*, volume 1. Elsevier San Diego, CA.
- Hartfield, M. (2016). Evolutionary genetic consequences of facultative sex and outcrossing. *J. Evol. Biol.*, 29(1):5–22.
- Henderson, I. R. (2012). Control of meiotic recombination frequency in plant genomes. *Curr. Opin. Plant Biol.*, 15(5):556–561.
- Hill, W. G. and Robertson, A. (1966). The effect of linkage on limits to artificial selection. *Genet. Res.*, 8(3):269–294.
- Hill, W. G. and Weir, B. S. (1988). Variances and covariances of squared linkage disequilibria in finite populations. *Theor. Popul. Biol.*, 33(1):54–78.
- International HapMap Consortium (2005). A haplotype map of the human genome. *Nature*, 437(7063):1299.
- Jensen-Seaman, M. I., Furey, T. S., Payseur, B. A., Lu, Y., Roskin, K. M., Chen, C.-F., Thomas, M. A., Haussler, D., and Jacob, H. J. (2004). Comparative recombination rates in the rat, mouse, and human genomes. *Genome Res.*, 14(4):528–538.
- Jones, R. F. (1970). Physiological and biochemical aspects of growth and gametogenesis in *Chlamydomonas reinhardtii*. *Ann. N. Y. Acad. Sci.*, 175(1):648–659.
- Kaback, D. B., Guacci, V., Barber, D., and Mahon, J. W. (1992). Chromosome size-dependent control of meiotic recombination. *Science*, 256(5054):228–232.
- Kathir, P., LaVoie, M., Brazelton, W. J., Haas, N. A., Lefebvre, P. A., and Silflow, C. D. (2003). Molecular map of the *Chlamydomonas reinhardtii* nuclear genome. *Eukaryot. Cell*, 2(2):362–379.
- Kaur, T. and Rockman, M. V. (2014). Crossover heterogeneity in the absence of hotspots in *Caenorhabditis elegans*. *Genetics*, 196(1):137–148.
- Kawakami, T., Mugal, C. F., Suh, A., Nater, A., Burri, R., Smeds, L., and Ellegren, H. (2017). Whole-genome patterns of linkage disequilibrium across flycatcher populations clarify the causes and consequences of fine-scale recombination rate variation in birds. *Mol. Ecol.*, 38(1):42–49.
- Kimura, M. (1962). On the probability of fixation of mutant genes in a population. *Genetics*, 47:713–719.
- Kliman, R. M. and Hey, J. (1993). Reduced natural selection associated with low recombination in drosophila melanogaster. *Mol. Biol. Evol.*, 10(6):1239–1258.
- Kronholm, I., Bassett, A., Baulcombe, D., and Collins, S. (2017). Epigenetic and genetic contributions to adaptation in *Chlamydomonas*. *Mol. Biol. Evol.*, 34(9):2285–2306.
- Lam, I. and Keeney, S. (2015). Nonparadoxical evolutionary stability of the recombination initiation landscape in yeast. *Science*, 350(6263):932–937.
- Li, H. and Durbin, R. (2009). Fast and accurate short read alignment with Burrows-



- Wheeler transform. *Bioinformatics*, 25(14):1754–1760.
- Li, X., Li, L., and Yan, J. (2015). Dissecting meiotic recombination based on tetrad analysis by single-microspore sequencing in maize. *Nat. Commun.*, 6:6648.
- Lichten, M. (2008). Meiotic chromatin: The substrate for recombination initiation. In Egel, R. and Lankenau, D.-H., editors, *Recombination and Meiosis: Models, Means, and Evolution*, pages 165–193. Springer Berlin Heidelberg, Berlin, Heidelberg.
- Liu, H., Huang, J., Sun, X., Li, J., Hu, Y., Yu, L., Liti, G., Tian, D., Hurst, L. D., and Yang, S. (2017). Tetrad analysis in plants and fungi finds large differences in gene conversion rates but no GC bias. *Nat Ecol Evol.*
- Mancera, E., Bourgon, R., Brozzi, A., Huber, W., and Steinmetz, L. M. (2008). High-resolution mapping of meiotic crossovers and non-crossovers in yeast. *Nature*, 454(7203):479–485.
- Manzano-Winkler, B., McGaugh, S. E., and Noor, M. A. F. (2013). How hot are *Drosophila* hotspots? Examining recombination rate variation and associations with nucleotide diversity, divergence, and maternal age in *Drosophila pseudoobscura*. *PLoS One*, 8(8):1–6.
- McVean, G. A. T., Myers, S. R., Hunt, S., Deloukas, P., Bentley, D. R., and Donnelly, P. (2004). The fine-scale structure of recombination rate variation in the human genome. *Science*, 304(5670):581–584.
- Merchant, S. S., Prochnik, S. E., Vallon, O., Harris, E. H., Karpowicz, S. J., Witman, G. B., Terry, A., Salamov, A., et al. (2007). The *Chlamydomonas* genome reveals the evolution of key animal and plant functions. *Science*, 318(5848):245–250.
- Morris, G. J., Coulson, G., and Clarke, A. (1979). The cryopreservation of *Chlamydomonas*. *Cryobiology*, 16(4):401–410.
- Mugal, C. F., Weber, C. C., and Ellegren, H. (2015). GC-biased gene conversion links the recombination landscape and demography to genomic base composition: GC-biased gene conversion drives genomic base composition across a wide range of species. *Bioessays*, 37(12):1317–1326.
- Ness, R. W., Kraemer, S. A., Colegrave, N., and Keightley, P. D. (2016). Direct estimate of the spontaneous mutation rate uncovers the effects of drift and recombination in the *Chlamydomonas reinhardtii* plastid genome. *Mol. Biol. Evol.*, 33(3):800–808.
- Ness, R. W., Morgan, A. D., Colegrave, N., and Keightley, P. D. (2012). Estimate of the spontaneous mutation rate in *Chlamydomonas reinhardtii*. *Genetics*, 192(4):1447–1454.
- Ness, R. W., Morgan, A. D., Vasanthakrishnan, R. B., Colegrave, N., and Keightley, P. D. (2015). Extensive de novo mutation rate variation between individuals and across the genome of *Chlamydomonas reinhardtii*. *Genome Res.*, 25(11):1739–1749.
- Page, S. L. and Hawley, R. S. (2003). Chromosome choreography: the meiotic ballet. *Science*, 301(5634):785–789.
- Pan, J., Sasaki, M., Kniewel, R., Murakami, H., Blitzblau, H. G., Tischfield, S. E., Zhu, X., Neale, M. J., Jasin, M., Socci, N. D., et al. (2011). A hierarchical combination of factors shapes the genome-wide topography of yeast meiotic recombination initiation. *Cell*, 144(5):719–731.
- Parvanov, E. D., Petkov, P. M., and Paigen, K. (2010). Prdm9 controls activation of mammalian recombination hotspots. *Science*, 327(5967):835.

- Payseur, B. A. and Nachman, M. W. (2002). Gene density and human nucleotide polymorphism. *Mol. Biol. Evol.*, 19(3):336–340.
- Pedersen, B. S., Eyring, K., De, S., Yang, I. V., and Schwartz, D. A. (2014). Fast and accurate alignment of long bisulfite-seq reads. *Unpublished data*.
- R Core Team (2017). R: A language and environment for statistical computing.
- Ratnakumar, A., Mousset, S., Glemin, S., Berglund, J., Galtier, N., Duret, L., and Webster, M. T. (2010). Detecting positive selection within genomes: the problem of biased gene conversion. *Philos. Trans. R. Soc. Lond. B Biol. Sci.*, 365(1552):2571–2580.
- Rockman, M. V. and Kruglyak, L. (2009). Recombinational landscape and population genomics of *Caenorhabditis elegans*. *PLoS Genet.*, 5(3).
- Ruderfer, D. M., Pratt, S. C., Seidel, H. S., and Kruglyak, L. (2006). Population genomic analysis of outcrossing and recombination in yeast. *Nat. Genet.*, 38(9):1077–1081.
- Saintenac, C., Falque, M., Martin, O. C., Paux, E., Feuillet, C., and Sourdille, P. (2009). Detailed recombination studies along chromosome 3B provide new insights on crossover distribution in wheat (*Triticum aestivum* L.). *Genetics*, 181(2):393–403.
- Sigurdsson, M. I., Smith, A. V., Bjornsson, H. T., and Jonsson, J. J. (2009). HapMap methylation-associated SNPs, markers of germline DNA methylation, positively correlate with regional levels of human meiotic recombination. *Genome Res.*, 19(4):581–589.
- Singhal, S., Leffler, E. M., Sannareddy, K., Turner, I., Venn, O., Hooper, D. M., Strand, A. I., Li, Q., Raney, B., Balakrishnan, C. N., Griffith, S. C., Mcvean, G., and Przeworski, M. (2015). Stable recombination hotspots in birds. *Science*, 350(6263):928–932.
- Stapley, J., Feulner, P. G. D., Johnston, S. E., Santure, A. W., and Smadja, C. M. (2017). Variation in recombination frequency and distribution across eukaryotes: patterns and processes. *Philos. Trans. R. Soc. Lond. B Biol. Sci.*, 372(1736).
- Suzuki, M. M. and Bird, A. (2008). DNA methylation landscapes: provocative insights from epigenomics. *Nat. Rev. Genet.*, 9(6):465–476.
- Tsai, I. J., Bensasson, D., Burt, A., and Koufopanou, V. (2008). Population genomics of the wild yeast *Saccharomyces paradoxus*: Quantifying the life cycle. *Proc. Natl. Acad. Sci. U. S. A.*, 105(12):4957–4962.
- Tsai, I. J., Burt, A., and Koufopanou, V. (2010). Conservation of recombination hotspots in yeast. *Proc. Natl. Acad. Sci. U. S. A.*, 107(17):7847–7852.
- Weisse, T. (2008). Distribution and diversity of aquatic protists: an evolutionary and ecological perspective. *Biodivers. Conserv.*, 17(2):243–259.
- Wickham, H. (2009). *ggplot2: Elegant graphics for data analysis*.
- Wijnker, E., Velikkakam James, G., Ding, J., Becker, F., Klasen, J. R., Rawat, V., Rowan, B. A., de Jong, D. F., de Snoo, C. B., Zapata, L., et al. (2013). The genomic landscape of meiotic crossovers and gene conversions in *Arabidopsis thaliana*. *Elife*, 2(2):e01426.
- Wu, T. C. and Lichten, M. (1994). Meiosis-induced double-strand break sites determined by yeast chromatin structure. *Science*, 263(5146):515–518.
- Yelina, N. E., Lambing, C., Hardcastle, T. J., Zhao, X., Santos, B., and Henderson,

- I. R. (2015). DNA methylation epigenetically silences crossover hot spots and controls chromosomal domains of meiotic recombination in *Arabidopsis*. *Genes Dev.*, 29(20):2183–2202.
- Zhou, W. (2017). BISCUIT. <https://github.com/zwdzwd/biscuit>.

# Supplementary Information

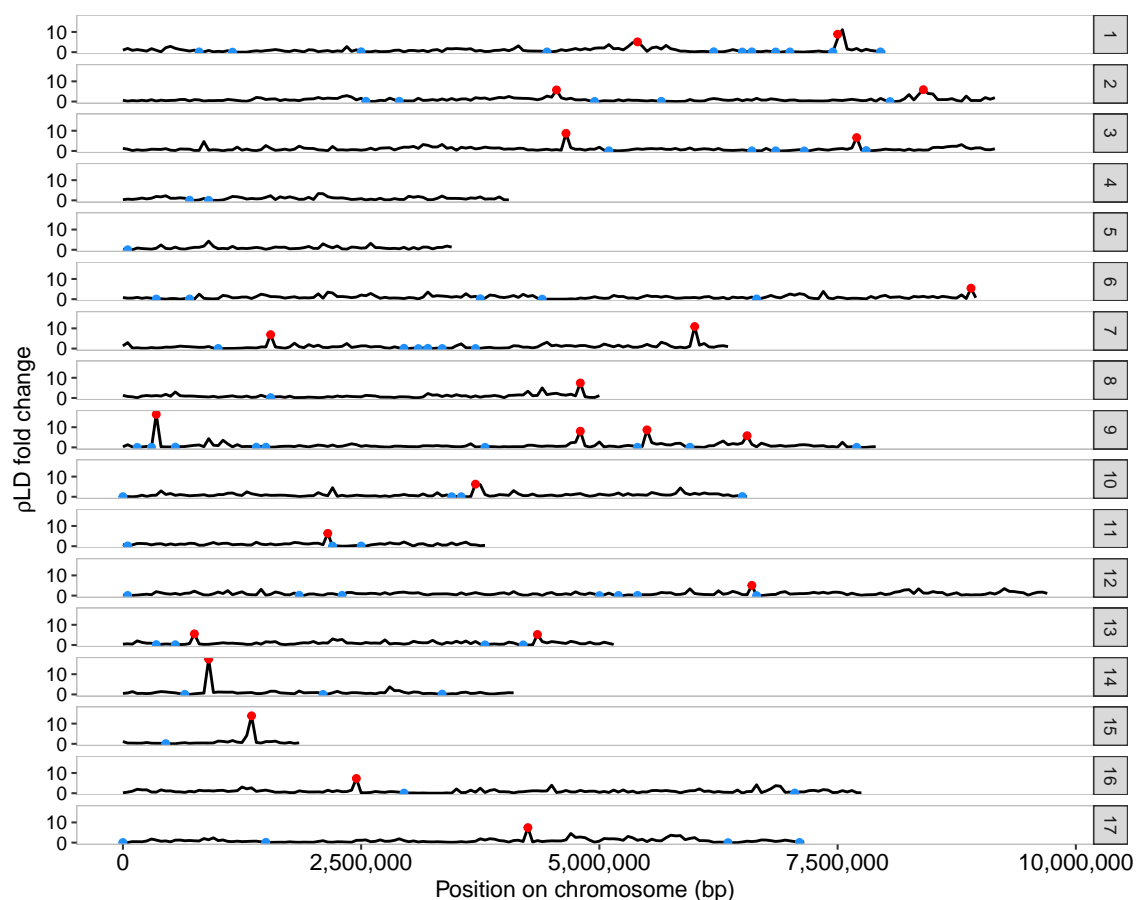

Figure S1: The landscape of recombination across the 17 chromosomes of *C. reinhardtii*, with  $\rho LD$  fold change calculated against chromosomal background and summarised in non-overlapping 50 kb windows. Red dots represent regions displaying 5-fold elevations in recombination rate compared to chromosome background ('hotspots') whilst regions with 5-fold lower recombination than background ('coldspots') are marked in blue.

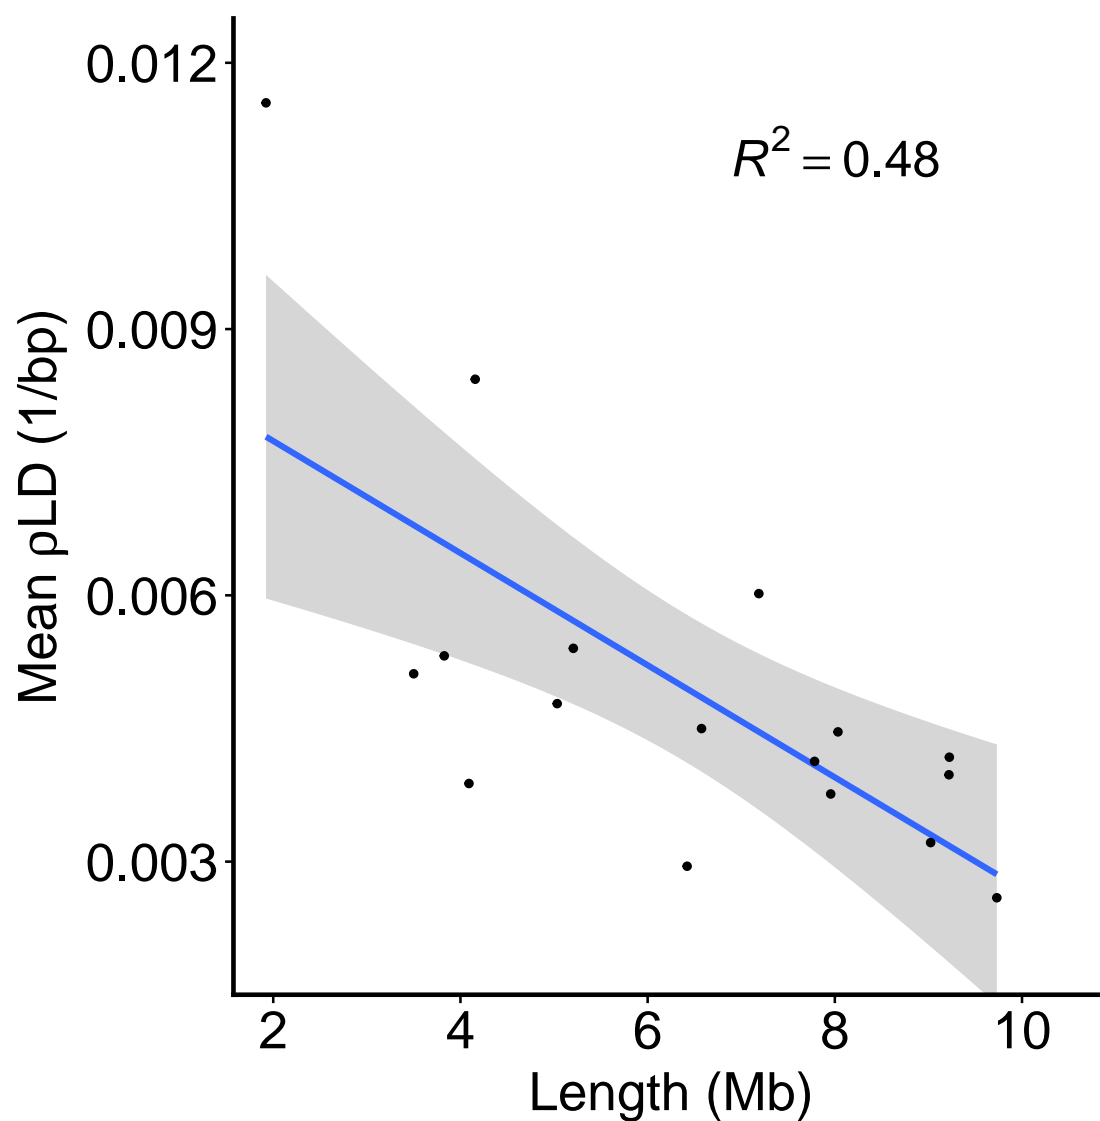

Figure S2: Chromosome length inversely scales with mean recombination rate ( $R^2 = 0.4803$ ). Each point represents one of the 17 *C. reinhardtii* chromosomes.

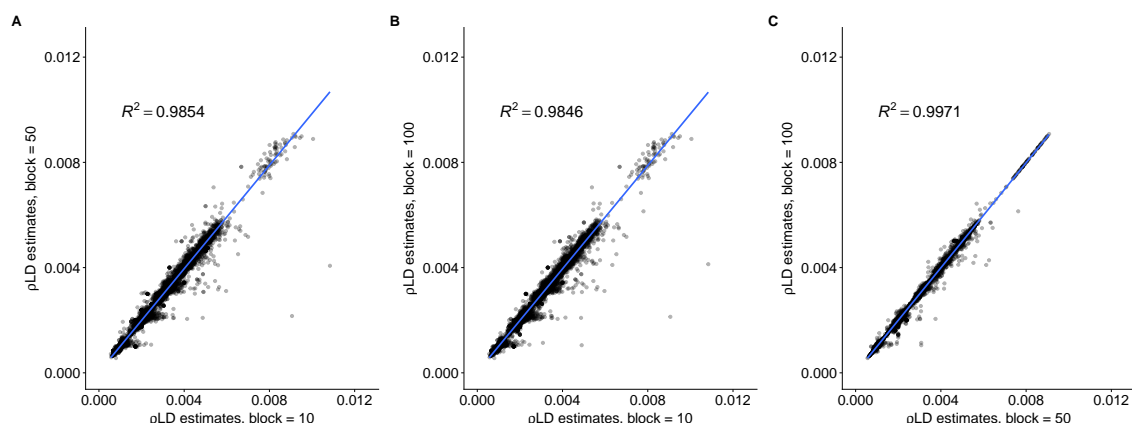

Figure S3: Variation in LDhelmet block penalty has minimal effects on recombination rate estimates.  $\rho LD$  estimates from independent LDhelmet runs on chromosome 12 of *C. reinhardtii* over three different block penalties (10, 50, and 100) were summarised in non-overlapping 500 bp windows. Each point represents  $\rho LD$  in one 500 bp window. **A** Comparison of  $\rho LD$  estimates from LDhelmet runs at block = 10 and block = 50 ( $R^2 = 0.9854$ ) **B** Comparison of  $\rho LD$  estimates from LDhelmet runs at block = 10 and block = 100 ( $R^2 = 0.9846$ ) **C** Comparison of  $\rho LD$  estimates from LDhelmet runs at block = 50 and block = 100 ( $R^2 = 0.9971$ ).

| Strain  | Collection Location/Year | Mating type |
|---------|--------------------------|-------------|
| CC-2936 | Farnham, Quebec/1993     | +           |
| CC-2937 | Farnham, Quebec/1993     | +           |
| CC-3060 | Farnham, Quebec/1995     | +           |
| CC-3064 | Farnham, Quebec/1995     | +           |
| CC-3065 | Farnham, Quebec/1995     | +           |
| CC-3068 | Farnham, Quebec/1995     | +           |
| CC-3071 | Farnham, Quebec/1995     | +           |
| CC-3076 | Montreal, Quebec/1995    | +           |
| CC-3086 | Montreal, Quebec/1995    | +           |
| CC-2935 | Farnham, Quebec/1993     | -           |
| CC-2938 | Farnham, Quebec/1993     | -           |
| CC-3059 | Farnham, Quebec/1995     | -           |
| CC-3061 | Farnham, Quebec/1995     | -           |
| CC-3062 | Farnham, Quebec/1995     | -           |
| CC-3063 | Farnham, Quebec/1995     | -           |
| CC-3073 | Farnham, Quebec/1995     | -           |
| CC-3075 | Montreal, Quebec/1995    | -           |
| CC-3079 | Montreal, Quebec/1995    | -           |
| CC-3084 | Montreal, Quebec/1995    | -           |

Table S1: Field strains of *C. reinhardtii* used in this study. All strains were obtained from the *Chlamydomonas* Resource Center ([chlamycollection.org](http://chlamycollection.org)). Mating types of mt- strains CC-3059 and CC-3062 are mislabelled as mt+ on the Resource Center website, and are instead mt- individuals (R.J. Craig, personal communication)
